# Supplementary material
Source: PubMed Central journal article supplement (PMC7081437)
Supplement: ao9b04411_si_001.pdf [file ao9b04411_si_001.pdf]

Supporting information for:

**Validation and evaluation of High-resolution Orbitrap mass spectrometry on molecular characterization of dissolved organic matter (DOM)**

Qiong Pan, Xiaocun Zhuo, Chen He\*, Yahe Zhang, Quan Shi\*

*State Key Laboratory of Heavy Oil Processing, Petroleum Molecular Engineering Center (PMEC),  
China University of Petroleum, Beijing 102249, China*

Contents

- (1) Table S1 Instrumental parameter of ESI-Orbitrap MS.
- (2) Figure S1 Mass distribution of condensate oil spectra of FT-ICR MS and Orbitrap MS.
- (3) Figure S2 Distribution of O10 compounds under different ion spray voltage.
- (4) Figure S3 Expanded spectra under evaluated ion spray voltage at m/z 351.
- (5) Figure S4 Distribution of O10 compounds under 275°C (left), 300°C (right) ion transfer tube temperature.
- (6) Figure S5 Distribution of O10 compounds under 20% (left), 100% (right) rf lens.
- (7) Figure S6 Typical category of compounds in different area of van Krevelen diagram.

**Table S1. Instrumental parameter of ESI-Orbitrap MS**

| Group | Sequence | Neg ion spray voltage | sheath gas | aux gas | ion transfer tube temp | rf lens | AGC target |
|-------|----------|-----------------------|------------|---------|------------------------|---------|------------|
| A     | 1        | 2600                  | 10         | 2       | 300                    | 60      | 500000     |
| A     | 2        | 2700                  | 10         | 2       | 300                    | 60      | 500000     |
| A     | 3        | 2800                  | 10         | 2       | 300                    | 60      | 500000     |
| A     | 4        | 2900                  | 10         | 2       | 300                    | 60      | 500000     |
| A     | 5        | 3000                  | 10         | 2       | 300                    | 60      | 500000     |
| A     | 6        | 3100                  | 10         | 2       | 300                    | 60      | 500000     |
| B     | 1        | 2600                  | 5          | 2       | 300                    | 60      | 500000     |
| B     | 2        | 2600                  | 7          | 2       | 300                    | 60      | 500000     |
| B     | 3        | 2600                  | 9          | 2       | 300                    | 60      | 500000     |
| B     | 4        | 2600                  | 11         | 2       | 300                    | 60      | 500000     |
| B     | 5        | 2600                  | 13         | 2       | 300                    | 60      | 500000     |
| B     | 6        | 2600                  | 15         | 2       | 300                    | 60      | 500000     |
| C     | 1        | 2600                  | 10         | 1       | 300                    | 60      | 500000     |
| C     | 2        | 2600                  | 10         | 2       | 300                    | 60      | 500000     |
| C     | 3        | 2600                  | 10         | 4       | 300                    | 60      | 500000     |
| C     | 4        | 2600                  | 10         | 6       | 300                    | 60      | 500000     |
| D     | 1        | 2600                  | 10         | 2       | 200                    | 60      | 500000     |
| D     | 2        | 2600                  | 10         | 2       | 225                    | 60      | 500000     |
| D     | 3        | 2600                  | 10         | 2       | 250                    | 60      | 500000     |
| D     | 4        | 2600                  | 10         | 2       | 275                    | 60      | 500000     |
| D     | 5        | 2600                  | 10         | 2       | 300                    | 60      | 500000     |
| E     | 1        | 2600                  | 10         | 2       | 300                    | 20      | 500000     |
| E     | 2        | 2600                  | 10         | 2       | 300                    | 40      | 500000     |
| E     | 3        | 2600                  | 10         | 2       | 300                    | 60      | 500000     |
| E     | 4        | 2600                  | 10         | 2       | 300                    | 80      | 500000     |
| E     | 5        | 2600                  | 10         | 2       | 300                    | 100     | 500000     |
| E     | 6        | 2600                  | 10         | 2       | 300                    | 120     | 500000     |
| F     | 1        | 2600                  | 10         | 2       | 300                    | 60      | 300000     |
| F     | 2        | 2600                  | 10         | 2       | 300                    | 60      | 350000     |
| F     | 3        | 2600                  | 10         | 2       | 300                    | 60      | 400000     |
| F     | 4        | 2600                  | 10         | 2       | 300                    | 60      | 450000     |
| F     | 5        | 2600                  | 10         | 2       | 300                    | 60      | 500000     |

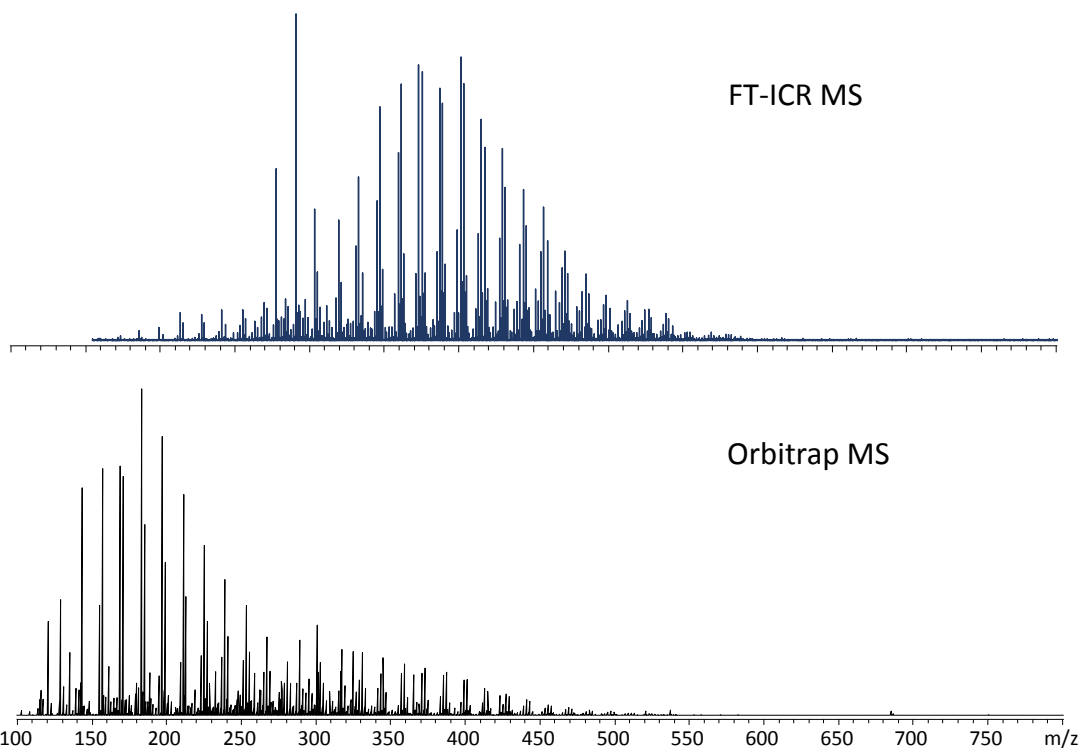

**Figure S1. Mass distribution of condensate oil spectra of FT-ICR MS and Orbitrap MS**

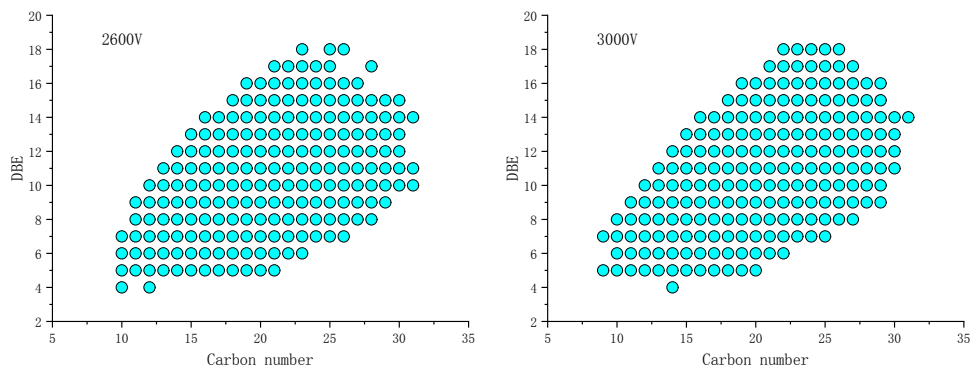

**Figure S2. Distribution of O10 compounds under different ion spray voltage**

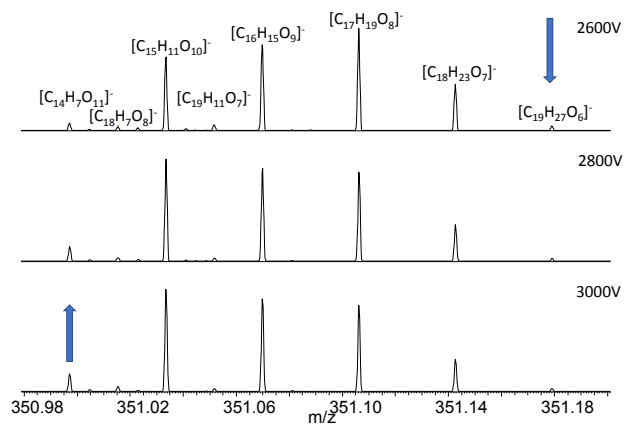

**Figure S3. Expanded spectra under evaluated ion spray voltage at  $m/z$  351**

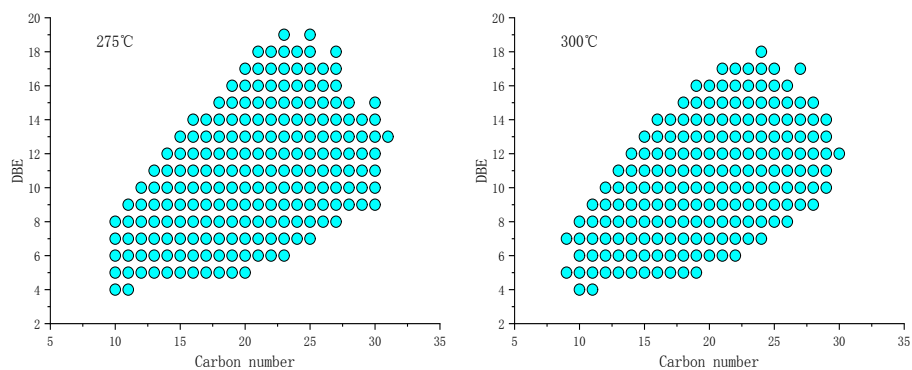

**Figure S4. Distribution of O10 compounds under 275°C (left), 300°C (right) ion transfer tube temperature**

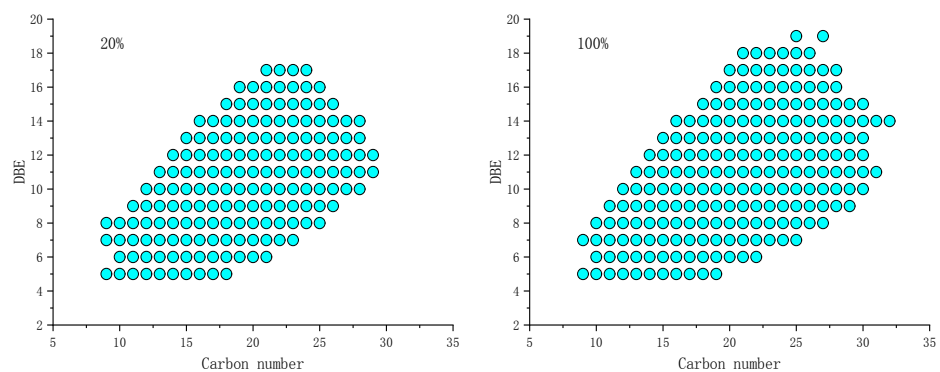

**Figure S5. Distribution of O10 compounds under 20% (left), 100% (right) rf lens**

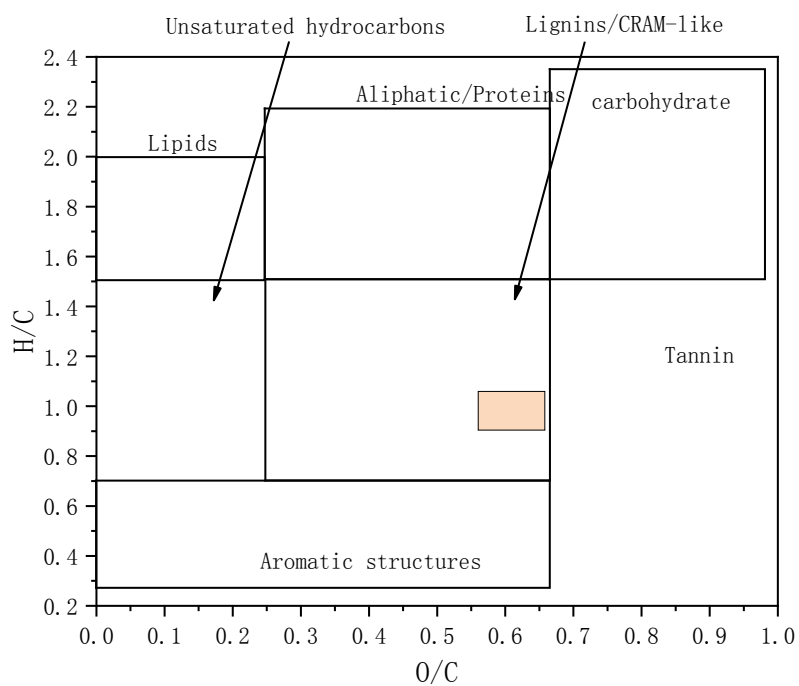

**Figure S6. Typical category of compounds in different area of van Krevelen diagram**
